# Supplementary material
Source: PubMed Central journal article supplement (PMC6870027)

SEED = Left Nucleus Accumbens

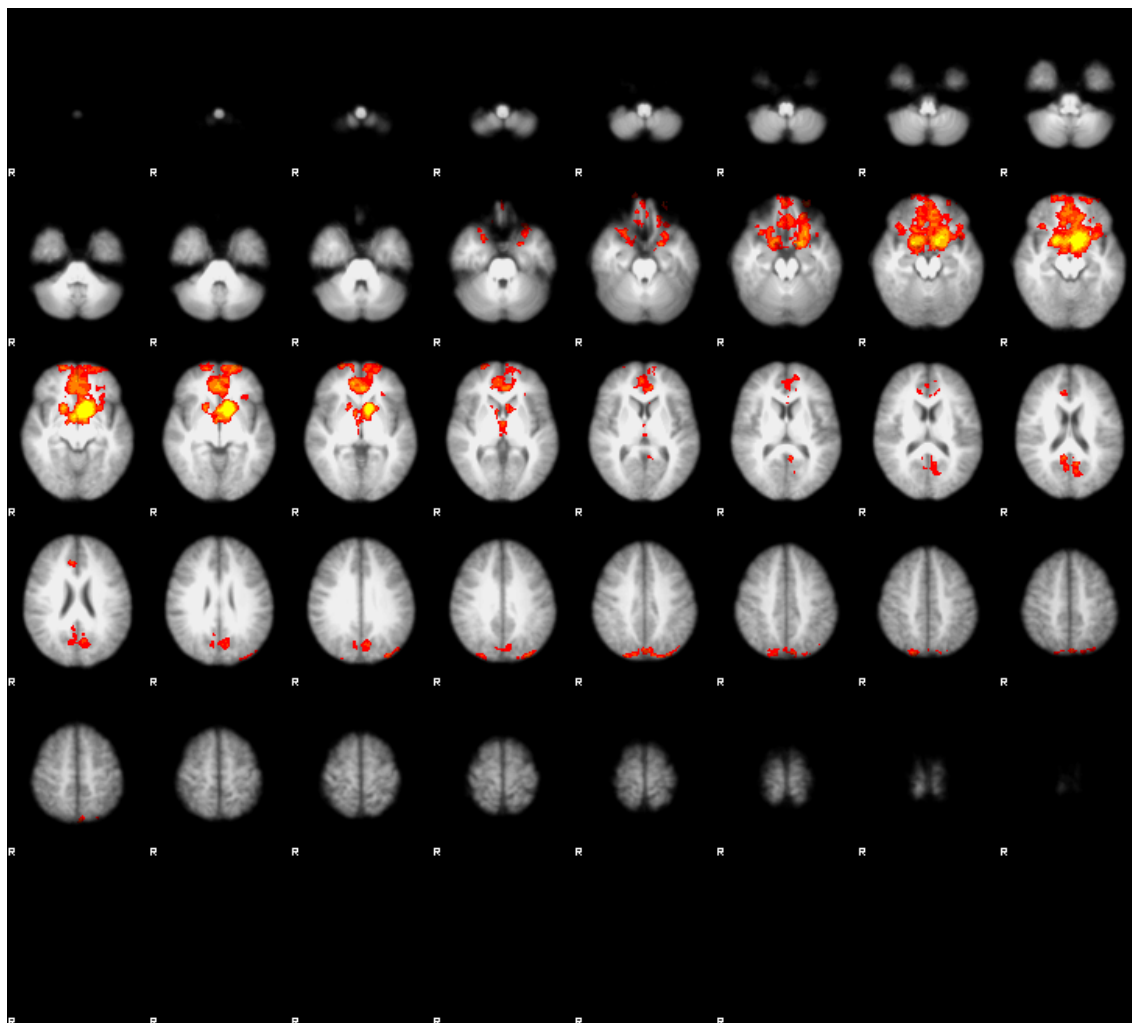

SEED = Right Nucleus Accumbens

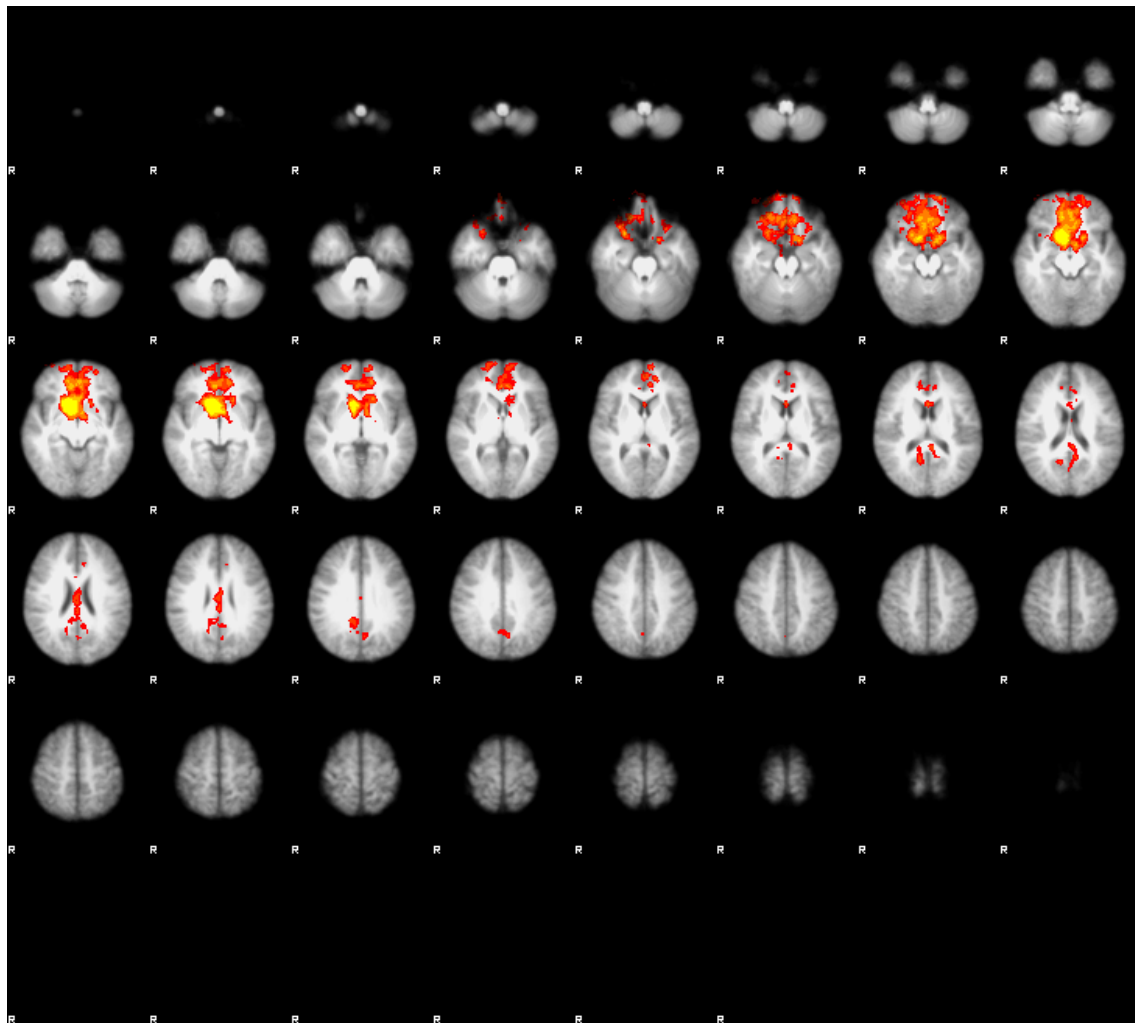

SEED = Left Caudate

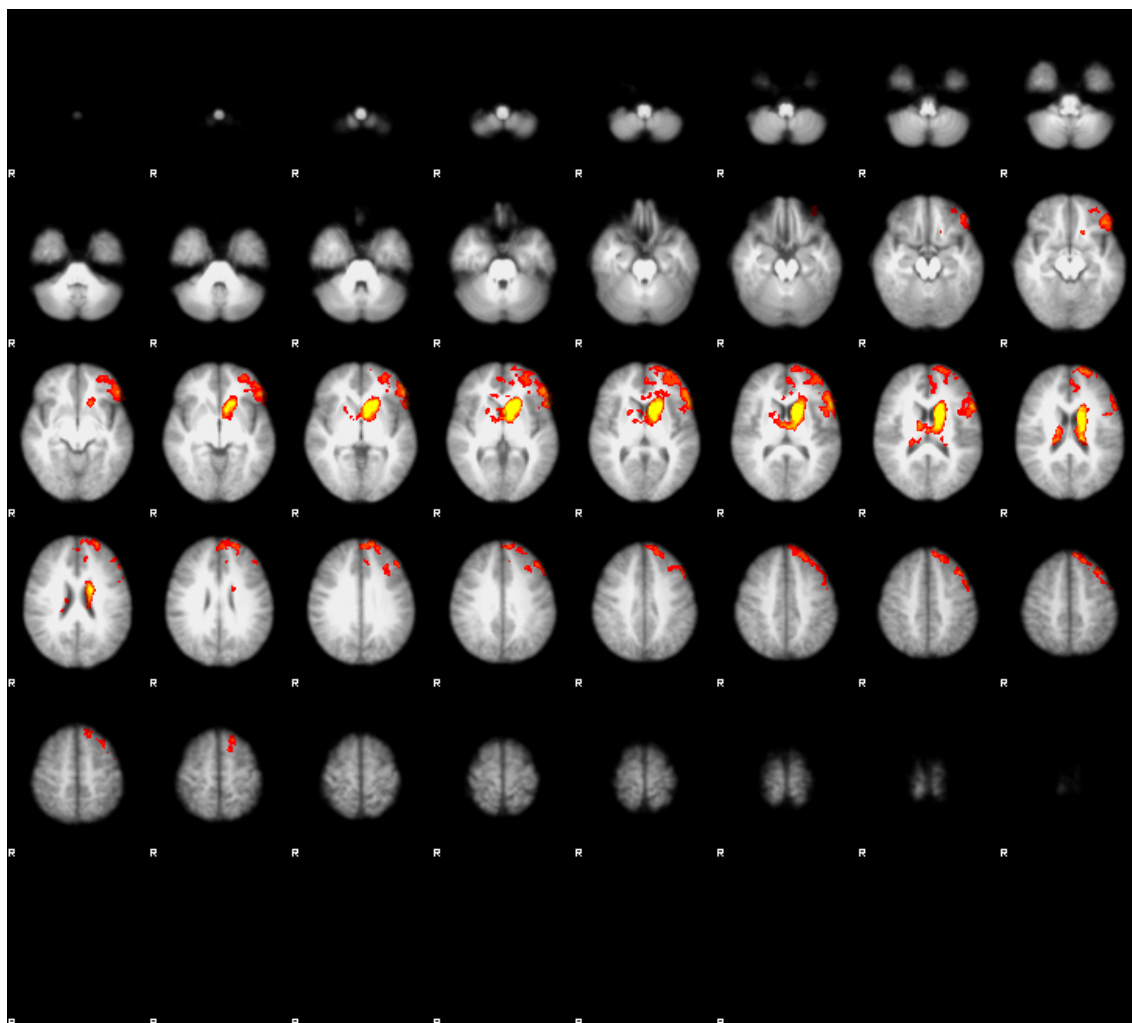

SEED = Right Caudate

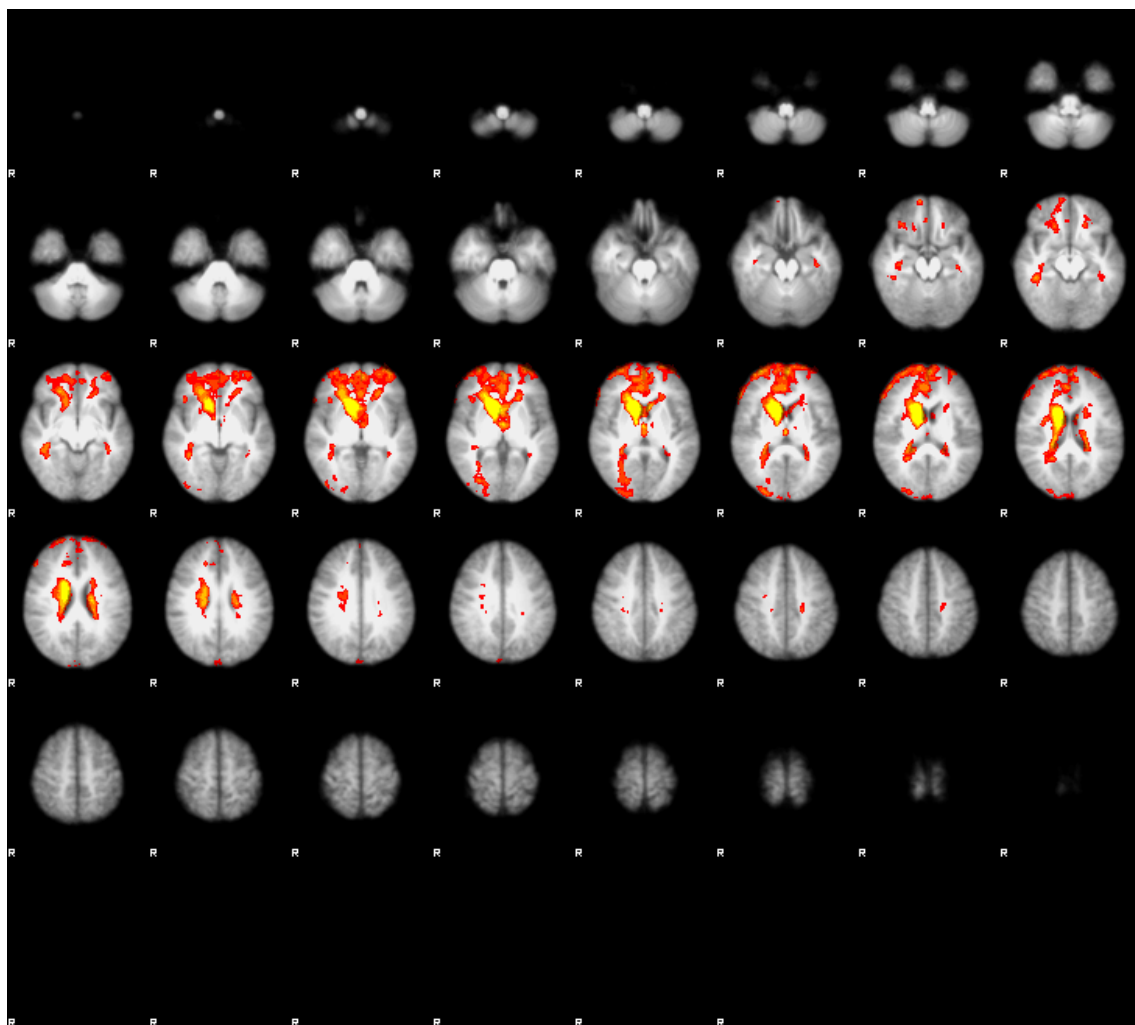

SEED = Left Putamen

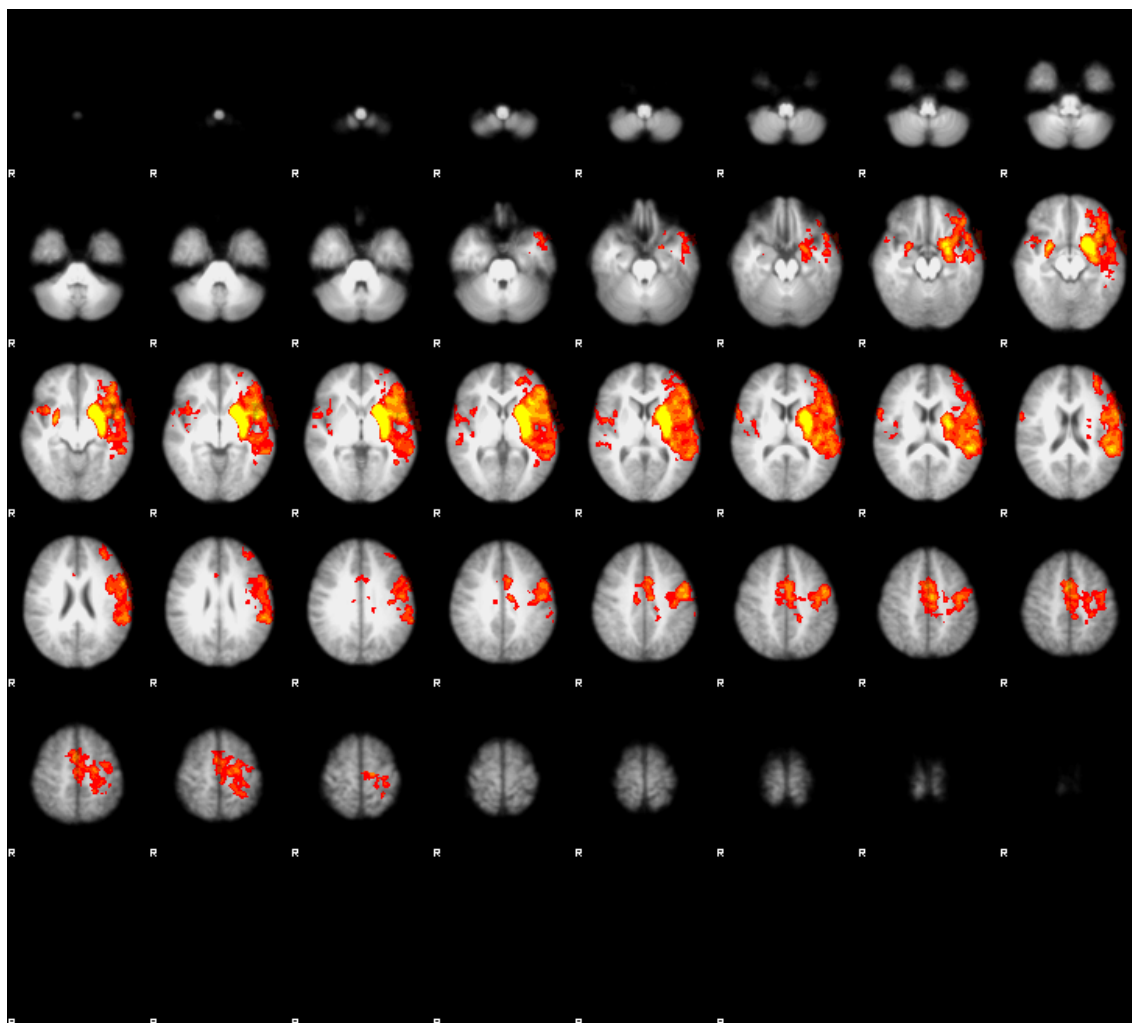

SEED = Right Putamen

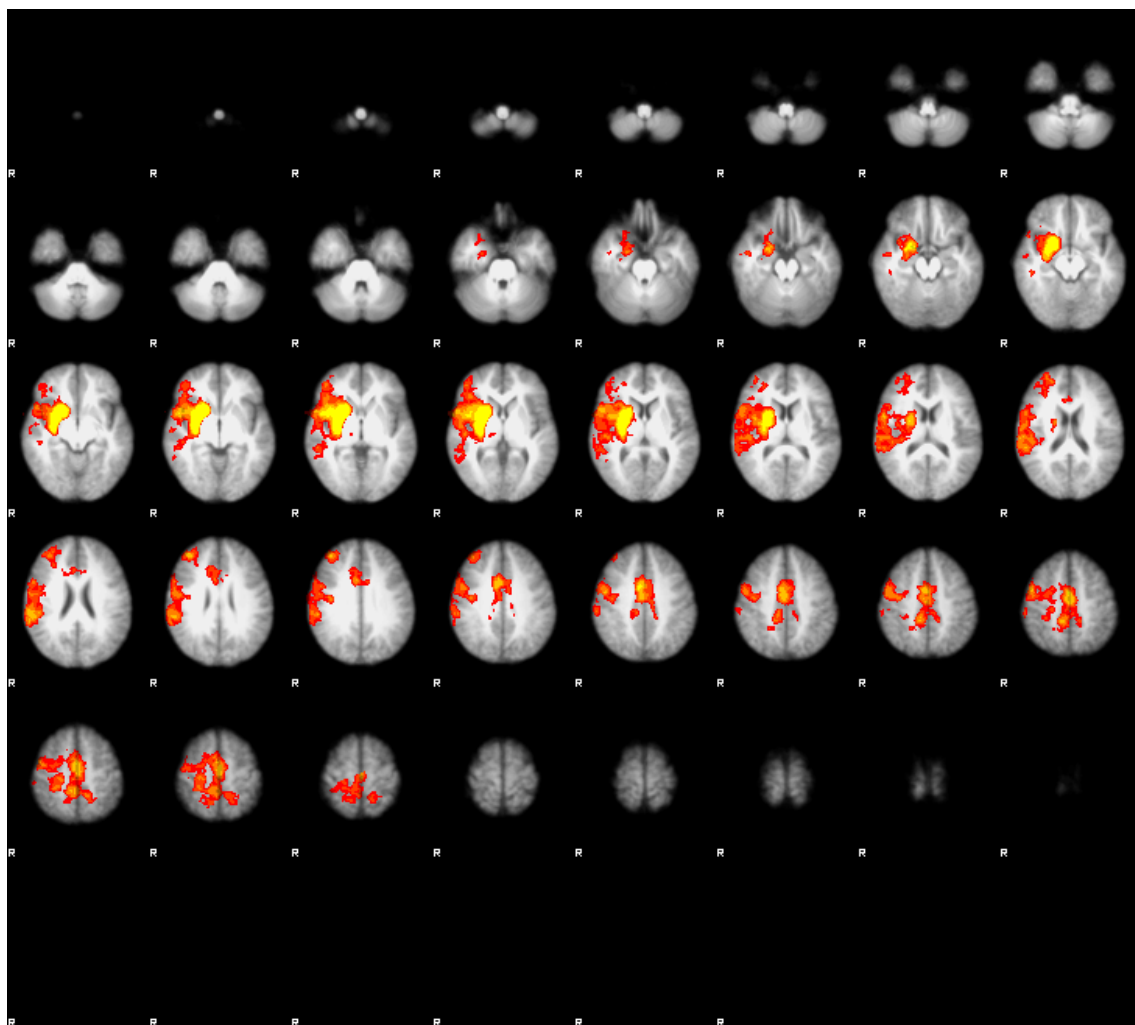

SEED = Left Thalamus

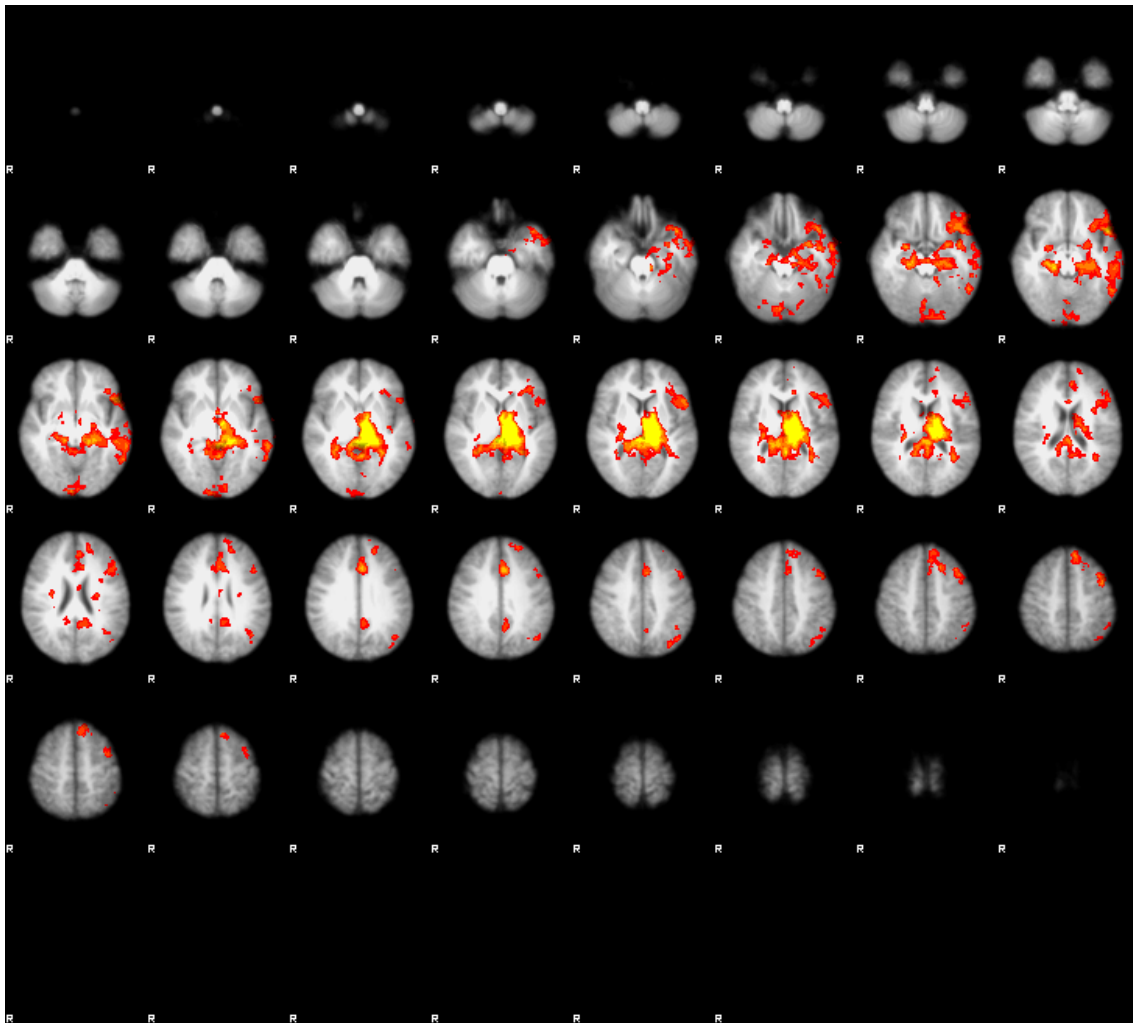

Supplement: HBM-33-2499-s001.pdf [file HBM-33-2499-s001.pdf]
